# Supplementary material for: Metalloproteinase inhibitors regulate biliary progenitor cells through sDLK1 in organoid models of liver injury
Source: JCI journal article supplement (doi:10.1172/jci164997), 2024-12-19

# Full unedited gel for Figure 2D P10 -NICD1

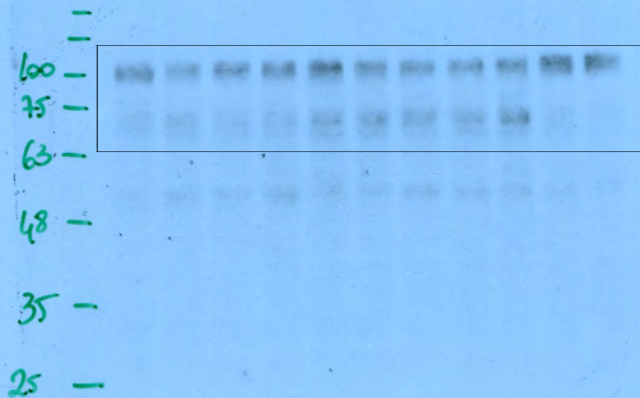

P10

Cleaved  
Notch  
4.67

Full unedited gel for Figure 2D P10 -NICD2

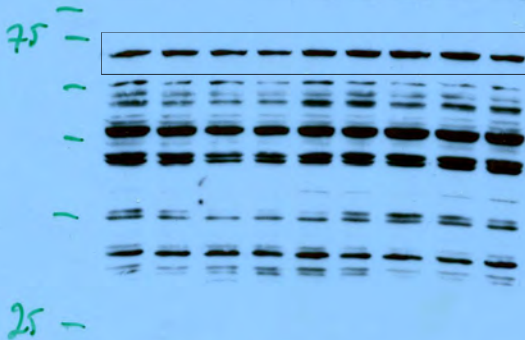



Full unedited gel for Figure 2D - b actin - P10

48 —

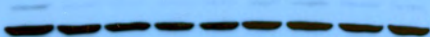

35 —

Full unedited gel for Figure 2D - NICD1 - 12w

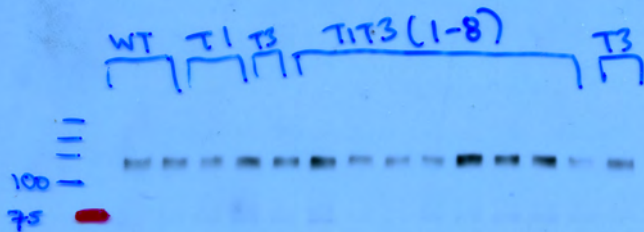

Full unedited gel for Figure 2D - b actin - 12w

48 —

35 —

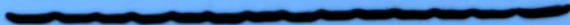

Full unedited gel for Figure 5H- P10- Dlk1

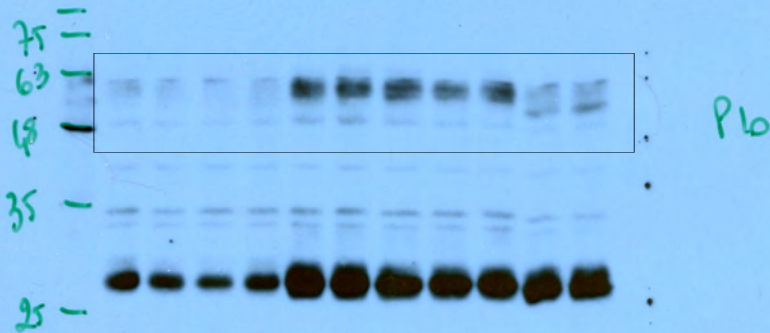

Full unedited gel for Figure 5H-P10-Sox9

816

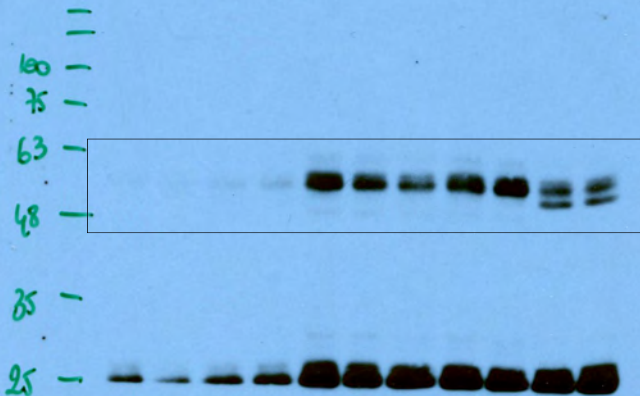

Full unedited gel for Figure 5H-P10-b actin

P10

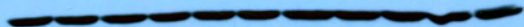

Full unedited gel for Figure 5H-12w-Dlk1

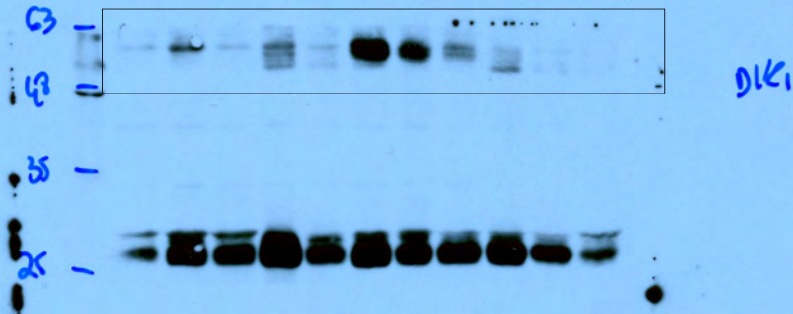

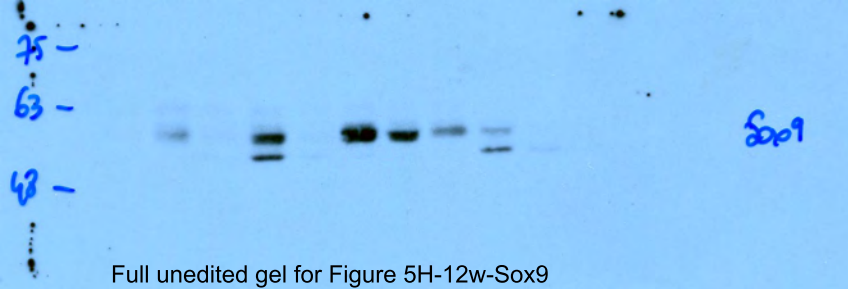



Full unedited gel for Figure 5H-12w-b actin

75 —

63 —

48 —

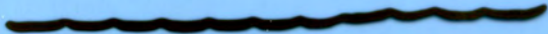

# Full unedited gel for Sup Figure 1F - PCNA

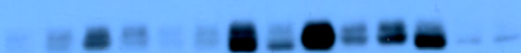

Full unedited gel for Sup Figure 1F - b actin

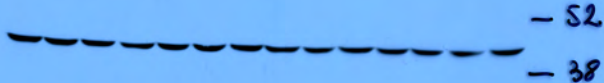

Full unedited gel for Sup Figure 3E-aSMA

T1T3 12w    T1T3 8m    T1 12w    WT 12w

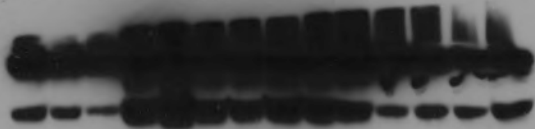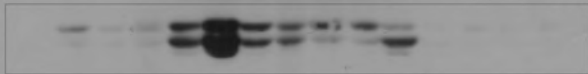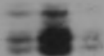

Full unedited gel for Sup Figure 3E-bactin

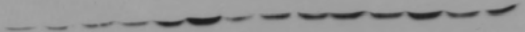

Full unedited gel for Sup Figure 5B - phospho ERK

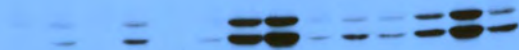

Full unedited gel for Sup Figure 5B - Total ERK

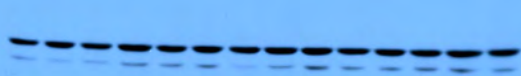

Full unedited gel for Sup Figure 5C - phospho SMAD2/3

Phospho SMAD2

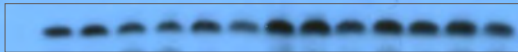

— 46

— 52

— 38



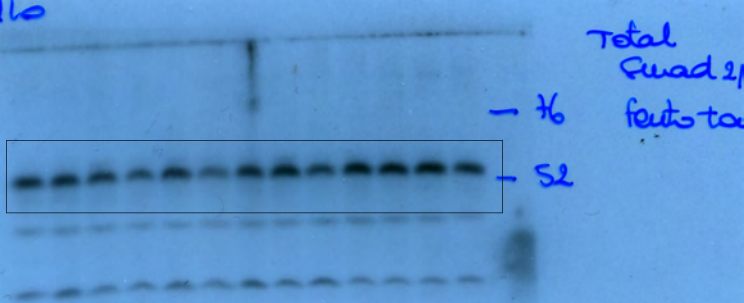

Full unedited gel for Sup Figure 5C - Total SMAD

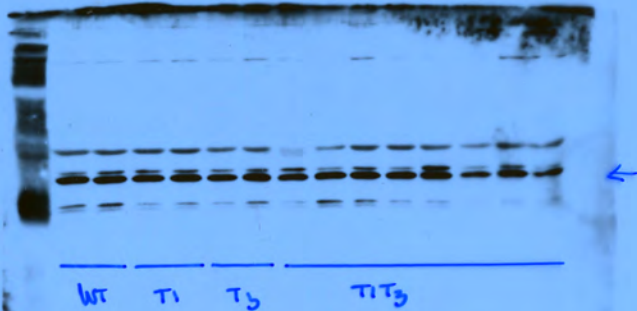

Full unedited gel for Sup Figure 5G - PDGF-B

Full unedited gel for Sup Figure 5G - b actin

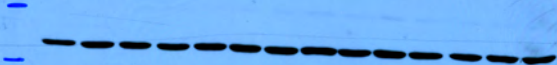

Supplement: sd2 [file 2]
